# Supplementary material for: Consequences of removal of exotic species (eucalyptus) on carbon and nitrogen cycles in the soil-plant system in a secondary tropical Atlantic forest in Brazil with a dual-isotope approach
Source: PeerJ. 2020 May 28;8:e9222. doi: 10.7717/peerj.9222 (PMC7261475; doi:10.7717/peerj.9222)
Supplement: Supplemental Information 4 [file peerj-08-9222-s004.xlsx]

## Sheet: soil
DataS4. Soil data.
Sample	area	δ13C (‰)	δ15N (‰)	C (%)	N (%)	C/N
soil	secondary forest	-28.724	4.923	1.58657	0.1625	11.3908
soil	secondary forest	-28.524	7.718	1.55328	0.140833	12.8674
soil	secondary forest	-28.5	6.488	1.81956	0.195	10.8863
soil	secondary forest	-29.566	3.772	0.961927	0.0725833	15.4615
soil	secondary forest	-29.487	5.019	1.69752	0.151667	13.0578
soil	secondary forest	-28.664	6.204	1.9638	0.205833	11.1308
soil	secondary forest	-29.143	4.251	0.975241	0.0758333	15.0037
soil	secondary forest	-29.45	3.881	0.643504	0.0563333	13.327
soil	secondary forest	-29.002	5.107	1.42015	0.119167	13.9035
soil	secondary forest	-28.753	6.453	2.00818	0.216667	10.8133
soil	secondary forest	-28.624	5.416	1.47562	0.140833	12.2241
soil	secondary forest	-29.193	5.115	1.37577	0.108333	14.8159
soil	secondary forest	-28.905	6.162	0.931971	0.0704167	15.4409
soil	secondary forest	-28.77	7.712	2.04146	0.216667	10.9925
soil	secondary forest	-29.102	6.69	1.32029	0.108333	14.2185
soil	secondary forest	-28.92	7	2.14131	0.03	83.2733
soil	secondary forest	-29.46	5.28	1.18715	0.0975	14.2053
soil	secondary forest	-29.03	5.243	0.644613	0.0476667	15.7772
soil	secondary forest	-29.041	7.246	1.9527	0.1625	14.0194
soil	secondary forest	-28.843	5.866	1.14055	0.078	17.0596
soil	secondary forest	-28.853	7.713	2.03036	0.195	12.1475
soil	secondary forest	-29.232	7.316	1.9638	0.151667	15.1061
soil	secondary forest	-29.105	5.648	0.674569	0.0509167	15.4566
soil	secondary forest	-29.115	7.136	2.03036	0.1625	14.577
soil	secondary forest	-28.45	6.631	1.32584	0.108333	14.2783
soil	M12	-28.742	3.795	2.5485	0.173333	17.1533
soil	M12	-29.606	4.009	3.44829	0.365083	11.0194
soil	M12	-28.748	3.606	3.76893	0.26	16.9119
soil	M12	-30.013	2.41	2.86914	0.281667	11.884
soil	M12	-30.367	3.318	3.60917	0.225333	18.6865
soil	M12	-30.498	2.443	3.63691	0.4	10.6076
soil	M12	-29.971	2.371	3.06552	0.310917	11.5029
soil	M12	-30.015	2.874	4.21273	0.411667	11.9389
soil	M12	-29.863	3.551	3.26745	0.325	11.7293
soil	M12	-30.889	2.846	4.70201	0.416	13.1867
soil	M12	-29.697	3.714	3.26966	0.205833	18.5325
soil	M12	-30.599	3.449	3.10546	0.280583	12.9125
soil	M12	-29.749	4.174	2.71936	0.26	12.2022
soil	M12	-28.515	4.426	2.73822	0.186333	17.1445
soil	M12	-28.623	4.205	2.30663	0.151667	17.7433
soil	M12	-28.693	4.403	2.71603	0.195	16.2497
soil	M12	-29.423	3.711	3.23083	0.205833	18.3124
soil	M12	-28.63	3.901	2.72269	0.184167	17.2478
soil	M12	-30.009	2.982	3.43054	0.195	20.5246
soil	M12	-28.978	3.494	3.4028	0.216667	18.3228
soil	M12	-30.597	3.679	3.16426	0.2795	13.208
soil	M12	-27.887	3.243	3.07328	0.140833	25.4592
soil	M12	-28.512	3.569	3.60584	0.249167	16.8835
soil	M12	-30.227	2.143	2.94015	0.26	13.193
soil	M12	-30.058	1.781	4.3847	0.238333	21.4636
soil	M3	-28.119	1.656	1.19825	0.0595833	23.4622
soil	M3	-26.827	3.072	1.27591	0.0660833	22.5256
soil	M3	-24.467	2.929	1.0995	0.0704167	18.2166
soil	M3	-28.646	4.501	2.94458	0.309833	11.0877
soil	M3	-28.072	3.21	1.98599	0.105083	22.049
soil	M3	-27.112	3.039	2.31994	0.124583	21.7252
soil	M3	-26.758	1.656	0.877606	0.0509167	20.1088
soil	M3	-26.582	2.175	1.6953	0.0823333	24.0225
soil	M3	-27.469	2.345	1.18715	0.05	27.7002
soil	M3	-27.7	3.664	2.42978	0.13	21.8057
soil	M3	-23.884	1.871	0.710073	0.04225	19.6075
soil	M3	-26.38	1.732	2.00152	0.091	25.6605
soil	M3	-28.211	4.358	1.42015	0.0736667	22.491
soil	M3	-28.233	2.831	1.28701	0.0693333	21.6564
soil	M3	-27.071	2.312	1.53109	0.0888333	20.1082
soil	M3	-25.178	3.259	1.15387	0.07475	18.0091
soil	M3	-24.575	2.713	0.764438	0.0476667	18.71
soil	M3	-25.025	2.397	1.42015	0.0834167	19.8622
soil	M3	-26.762	2.101	1.49781	0.0931667	18.7561
soil	M3	-25.665	2.014	0.863182	0.0433333	23.2395
soil	M3	-26.373	1.469	0.835445	0.0509167	19.1428
soil	M3	-27.334	3.834	1.19603	0.0790833	17.6443
soil	M3	-26.425	1.439	1.0995	0.0595833	21.5287
soil	M3	-26.048	2.492	3.34511	0.140833	27.711
soil	M3	-27.632	2.123	1.03182	0.0541667	22.2239
