# Supplementary material for: Consequences of removal of exotic species (eucalyptus) on carbon and nitrogen cycles in the soil-plant system in a secondary tropical Atlantic forest in Brazil with a dual-isotope approach
Source: PeerJ. 2020 May 28;8:e9222. doi: 10.7717/peerj.9222 (PMC7261475; doi:10.7717/peerj.9222)
Supplement: Supplemental Information 5 [file peerj-08-9222-s005.xlsx]

## Sheet: litter
DataS5. Litter data.
Sample	area	δ13C (‰)	δ15N (‰)	C (%)	N (%)	C/N
Leaves	Secondary forest	-30.861	3.254	47.4535	2.2456	24.6537
Leaves	Secondary forest	-31.366	3.291	49.6431	2.4096	24.0359
Leaves	Secondary forest	-30.699	3.321	45.8402	2.3552	22.7073
Leaves	Secondary forest	-30.456	3.56	45.339	2.4512	21.5794
Leaves	Secondary forest	-31.376	3.058	46.4176	2.2608	23.9534
wood	Secondary forest	-29.81	3.09	46.5596	1.3272	40.9279
wood	Secondary forest	-29.306	3.094	46.861	1.6288	33.5653
wood	Secondary forest	-29.572	3.255	39.1687	1.2896	35.4348
wood	Secondary forest	-30.263	3.019	52.8189	1.7968	34.2954
wood	Secondary forest	-29.395	3.217	47.2294	1.3688	40.255
fruit	Secondary forest	-26.87	3.237	47.9293	1.1192	49.962
fruit	Secondary forest	-27.44	3.725	47.487	1.3288	41.6929
fruit	Secondary forest	-27.714	3.69	47.8704	1.4376	38.8486
fruit	Secondary forest	-27.785	3.448	47.2387	1.4056	39.2087
fruit	Secondary forest	-27.85	3.729	47.8069	1.3904	40.1141
rest	Secondary forest	-29.074	2.919	52.2507	1.432	42.5692
rest	Secondary forest	-29.241	2.815	48.3312	1.3104	43.0299
rest	Secondary forest	-29.818	2.892	49.7308	1.188	48.8378
rest	Secondary forest	-29.801	3.012	49.6789	1.4376	40.3163
rest	Secondary forest	-29.627	4.014	50.694	1.3952	42.3903
leaves	M12	-31.241	0.662	47.562	1.428	38.8579
leaves	M12	-30.79	0.78	48.9005	1.5608	36.5521
leaves	M12	-31.041	0.381	49.9814	1.4848	39.2724
leaves	M12	-31.739	0.26	47.4627	1.4448	38.3258
leaves	M12	-31.557	0.631	48.8855	1.4336	39.7831
wood	M12	-30.813	-0.79	51.3002	0.5888	101.648
wood	M12	-30.136	-0.853	45.6565	0.6552	81.2973
wood	M12	-29.871	-0.868	48.3762	0.6192	91.1481
wood	M12	-30.128	-0.965	48.7885	0.5104	111.52
wood	M12	-29.776	-0.646	47.823	0.5808	96.0632
fruit	M12	-30.017	1.012	50.008	1.4224	41.017
fruit	M12	-30.351	4.295	49.6488	1.65	35.1052
fruit	M12	-30.274	1.08	49.3647	1.2552	45.8829
fruit	M12	-29.366	0.997	50.7852	1.5168	39.0621
fruit	M12	-29.361	1.519	49.2412	1.3856	41.4608
rest	M12	-30.643	-0.16	47.5551	1.1744	47.242
rest	M12	-30.192	-0.559	47.5355	1.1824	46.903
rest	M12	-30.663	-0.263	46.8876	1.0848	50.4261
rest	M12	-31.416	0.035	50.0392	1.172	49.8115
rest	M12	-31.494	0.256	49.889	1.28	45.4718
leaves	M3	-30.225	1.796	47.8796	1.292	43.2349
leaves	M3	-30.59	0.867	49.6465	1.3096	44.228
leaves	M3	-31.231	0.996	54.1388	1.3576	46.5247
leaves	M3	-31.479	1.054	53.812	1.5112	41.5436
leaves	M3	-30.646	1.149	51.5127	1.4608	41.1406
wood	M3	-29.233	-0.245	46.7017	0.5328	102.262
wood	M3	-29.137	0.127	45.6589	0.5272	101.041
wood	M3	-29.146	0.311	48.0921	0.544	103.139
wood	M3	-29.118	-0.269	49.225	0.4368	131.477
wood	M3	-29.459	-0.146	47.83	0.5992	93.1269
Fruit	M3	-28.347	0.034	48.6984	0.7496	75.7935
Fruit	M3	-28.608	0.816	45.6623	0.8728	61.0366
Fruit	M3	-28.567	-0.432	46.6809	0.9232	58.9916
Fruit	M3	-28.859	0.686	45.4129	0.7832	67.6477
Fruit	M3	-29.11	0.816	45.0179	0.848	61.935
rest	M3	-24.602	-0.291	46.4476	0.8288	65.3823
rest	M3	-24.165	0.067	43.6598	0.8888	57.3093
rest	M3	-23.538	0.289	45.1276	0.9104	57.8305
rest	M3	-23.571	-0.16	45.2708	0.9328	56.6209
rest	M3	-23.199	0.189	44.8435	0.8632	60.6087
