# Supplementary material for: Consequences of removal of exotic species (eucalyptus) on carbon and nitrogen cycles in the soil-plant system in a secondary tropical Atlantic forest in Brazil with a dual-isotope approach
Source: PeerJ. 2020 May 28;8:e9222. doi: 10.7717/peerj.9222 (PMC7261475; doi:10.7717/peerj.9222)
Supplement: Supplemental Information 6 [file peerj-08-9222-s006.xlsx]

## Sheet: live leaves
DataS6. Live leaves data.
Sample	area	specie	δ13C (‰)	δ15N (‰)	C (%)	N (%)	C/N
live leaves	Secondary Forest	Xylopia sericea	-33.407	2.954	45.0572	2.5584	20.5467
live leaves	Secondary Forest	Xylopia sericea	-31.924	2.844	46.3402	2.6696	20.2516
live leaves	Secondary Forest	Xylopia sericea	-32.181	0.461	48.6049	2.32	24.4421
live leaves	Secondary Forest	Xylopia sericea	-30.068	2.362	50.3071	2.0824	28.1846
live leaves	Secondary Forest	Xylopia sericea	-34.452	3.009	48.9779	2.3864	23.9444
live leaves	Secondary Forest	Byrsonima sericea	-32.795	0.59	49.0703	1.4096	40.6134
live leaves	Secondary Forest	Byrsonima sericea	-33.064	0.02	50.0715	1.842	31.7138
live leaves	Secondary Forest	Byrsonima sericea	-32.897	2.092	48.1037	1.6272	34.4893
live leaves	Secondary Forest	Byrsonima sericea	-34.565	2.884	46.167	2.4752	21.7605
live leaves	Secondary Forest	Byrsonima sericea	-31.632	-3.39	48.6349	1.5432	36.7682
live leaves	Secondary Forest	Senefeldera verticilata	-31.595	3.415	41.2309	1.61043	25.6025
live leaves	Secondary Forest	Senefeldera verticilata	-31.834	5.118	41.3182	1.97247	20.9474
live leaves	Secondary Forest	Senefeldera verticilata	-32.029	4.474	39.0907	1.48099	26.3949
live leaves	Secondary Forest	Senefeldera verticilata	-30.361	4.976	42.9606	2.07189	20.735
live leaves	Secondary Forest	Senefeldera verticilata	-31.244	3.357	42.0596	1.80083	23.3557
live leaves	Secondary Forest	Siparuna guianenses	-30.797	1.767	40.2065	2.9845	13.4718
live leaves	Secondary Forest	Siparuna guianenses	-30.472	0.296	41.6671	2.46863	16.8786
live leaves	Secondary Forest	Siparuna guianenses	-32.934	2.602	40.7544	2.24447	18.1577
live leaves	Secondary Forest	Siparuna guianenses	-30.862	6.277	42.0787	2.49959	16.8343
live leaves	Secondary Forest	Siparuna guianenses	-30.726	3.169	42.3053	3.00513	14.0777
live leaves	Secondary Forest	Geissospermum laeve	-33.175	5.008	46.6784	2.53523	18.4119
live leaves	Secondary Forest	Geissospermum laeve	-35.1499	9.008	42.9744	2.43674	17.636
live leaves	Secondary Forest	Geissospermum laeve	-32.388	3.889	45.6817	2.50334	18.2483
live leaves	Secondary Forest	Geissospermum laeve	-34.343	8.678	42.1809	2.28199	18.4843
live leaves	Secondary Forest	Geissospermum laeve	-33.938	4.114	42.4064	2.20883	19.1986
live leaves	Secondary Forest	Mabea fistulifera	-33.683	1.757	41.7734	1.97059	21.1984
live leaves	Secondary Forest	Mabea fistulifera	-32.131	1.529	41.2565	1.56447	26.3709
live leaves	Secondary Forest	Mabea fistulifera	-33.556	2.253	42.3808	1.77081	23.933
live leaves	Secondary Forest	Mabea fistulifera	-30.301	1.409	41.8117	2.18913	19.0997
live leaves	Secondary Forest	Mabea fistulifera	-31.801	0.633	41.3937	1.62168	25.5251
live leaves	Secondary Forest	Miconia hypoleuca	-32.881	0.379	39.8512	1.61606	24.6596
live leaves	Secondary Forest	Miconia hypoleuca	-31.936	1.747	42.217	1.61418	26.1539
live leaves	Secondary Forest	Miconia hypoleuca	-31.789	2.773	44.0456	1.9931	22.099
live leaves	Secondary Forest	Miconia hypoleuca	-30.464	0.34	39.9693	1.26527	31.5896
live leaves	Secondary Forest	Miconia hypoleuca	-30.981	1.384	41.3979	1.67421	24.7269
live leaves	Secondary Forest	Guarea guidonea	-29.754	1.82	41.1692	3.2368	12.7191
live leaves	Secondary Forest	Guarea guidonea	-28.829	1.761	44.9147	2.49208	18.023
live leaves	Secondary Forest	Guarea guidonea	-32.362	6.777	42.1723	3.53131	11.9424
live leaves	Secondary Forest	Guarea guidonea	-31.937	1.932	41.4277	3.06985	13.495
live leaves	Secondary Forest	Guarea guidonea	-32.107	2.251	40.6863	2.71062	15.01
live leaves	Secondary Forest	Tibouchina estrellensis	-29.463	2.524	45.7104	1.93683	23.6006
live leaves	Secondary Forest	Tibouchina estrellensis	-30.078	2.315	42.8063	1.62637	26.3201
live leaves	Secondary Forest	Tibouchina estrellensis	-29.728	2.726	43.3223	2.01186	21.5334
live leaves	Secondary Forest	Tibouchina estrellensis	-29.053	1.437	42.9542	1.72392	24.9166
live leaves	Secondary Forest	Tibouchina estrellensis	-30.741	2.524	44.5392	1.76612	25.2186
live leaves	Secondary Forest	Ocotea diospyrifolia	-31.9	0.99	45.5029	2.77628	16.3899
live leaves	Secondary Forest	Ocotea diospyrifolia	-32.26	1.564	46.0689	2.176	21.1713
live leaves	Secondary Forest	Ficus gomelleira	-31.253	2.008	42.6319	1.45848	29.2303
live leaves	Secondary Forest	Ficus gomelleira	-31.121	2.865	42.4234	1.93495	21.9248
live leaves	Secondary Forest	Ficus gomelleira	-32.781	2.129	34.992	1.36563	25.6234
live leaves	Secondary Forest	Ficus gomelleira	-30.081	2.125	40.1799	1.69672	23.681
live leaves	Secondary Forest	Cupania racemosa	-29.748	1.959	46.1859	2.32326	19.8798
live leaves	Secondary Forest	Cupania racemosa	-33.683	1.587	42.134	1.93401	21.7858
live leaves	Secondary Forest	Cupania racemosa	-30.718	2.845	45.2157	2.21258	20.4358
live leaves	Secondary Forest	Cupania racemosa	-28.586	2.054	45.6423	2.39454	19.061
live leaves	Secondary Forest	Pseudopiptadenia contorta	-29.091	1.144	44.5222	2.37297	18.7622
live leaves	Secondary Forest	Pseudopiptadenia contorta	-30.622	4.535	42.3362	2.30825	18.3413
live leaves	Secondary Forest	Pseudopiptadenia contorta	-30.733	0.227	47.3581	2.46394	19.2204
live leaves	Secondary Forest	Pseudopiptadenia contorta	-32.047	2.269	43.4733	2.1141	20.5635
live leaves	Secondary Forest	Pseudopiptadenia contorta	-32.998	0.187	43.7914	2.08502	21.0028
live leaves	Secondary Forest	Virola bicuhyba	-32.384	6.263	43.7148	1.84397	23.7069
live leaves	Secondary Forest	Virola bicuhyba	-33.336	4.983	43.452	2.18632	19.8745
live leaves	Secondary Forest	Virola bicuhyba	-33.18	8.852	44.3881	2.04188	21.7389
live leaves	Secondary Forest	Virola bicuhyba	-32.391	5.683	41.3958	1.93964	21.342
live leaves	Secondary Forest	Virola bicuhyba	-32.247	4.337	42.8723	1.96497	21.8183
live leaves	Secondary Forest	Heliscostylis tomentosa	-30.682	4.673	43.0627	2.59807	16.5749
live leaves	Secondary Forest	Heliscostylis tomentosa	-31.541	4.018	41.9298	2.53429	16.545
live leaves	Secondary Forest	Heliscostylis tomentosa	-31.847	5.436	40.7533	2.48364	16.4087
live leaves	Secondary Forest	Heliscostylis tomentosa	-32.039	5.302	41.8585	2.6853	15.588
live leaves	Secondary Forest	Heliscostylis tomentosa	-29.986	4.644	40.3395	2.11879	19.039
live leaves	Secondary Forest	Brosinum glazioui	-32.706	4.542	38.8556	2.50428	15.5157
live leaves	Secondary Forest	Brosinum glazioui	-32.616	6.171	40.9437	2.71812	15.0632
live leaves	Secondary Forest	Brosinum glazioui	-33.169	5.491	31.1402	2.12348	14.6647
live leaves	Secondary Forest	Brosinum glazioui	-32.129	4.328	38.0641	2.15912	17.6295
live leaves	Secondary Forest	Micropholis guianensis	-31.541	2.994	45.2913	2.99669	15.1138
live leaves	Secondary Forest	Micropholis guianensis	-32.48	2.111	43.7403	2.48927	17.5715
live leaves	Secondary Forest	Virola gardneri	-33.095	6.823	36.7749	1.3328	27.5922
live leaves	Secondary Forest	Virola gardneri	-34.298	1.723	42.5447	2.01186	21.1469
live leaves	Secondary Forest	Handroanthus chrysotrichus	-29.205	2.058	41.4033	2.36546	17.5032
live leaves	Secondary Forest	Handroanthus chrysotrichus	-30.691	0.727	45.3998	2.2107	20.5363
live leaves	Secondary Forest	Handroanthus chrysotrichus	-30.376	0.518	31.3976	1.34593	23.3278
live leaves	Secondary Forest	Handroanthus chrysotrichus	-31.226	0.19	43.6978	2.1488	20.3359
live leaves	Secondary Forest	Handroanthus chrysotrichus	-30.13	-1.132	45.1657	2.15443	20.9641
live leaves	Secondary Forest	Apuleia liocarpa	-32.277	1.783	39.6353	2.10097	18.8653
live leaves	Secondary Forest	Apuleia liocarpa	-31.451	1.059	43.0595	1.92557	22.3619
live leaves	Secondary Forest	Apuleia liocarpa	-30.986	2.082	35.843	2.02968	17.6594
live leaves	Secondary Forest	Apuleia liocarpa	-32.466	2.369	40.7724	2.8757	14.1783
live leaves	Secondary Forest	Apuleia liocarpa	-32.097	1.776	36.2802	1.84866	19.6251
live leaves	M12	Xylopia sericea	-32.157	48.6256	1.6624	-4.018	34.1253
live leaves	M12	Xylopia sericea	-32.591	46.5977	1.7112	-3.116	31.7695
live leaves	M12	Xylopia sericea	-31.706	48.7688	1.3704	-3.578	41.5185
live leaves	M12	Xylopia sericea	-33.008	54.401	1.6408	0.162	38.681
live leaves	M12	Xylopia sericea	-31.316	49.5333	2.481	1.952	23.2926
live leaves	M12	Xylopia sericea	-32.474	48.099	1.5616	-3.532	35.9346
live leaves	M12	Xylopia sericea	-32.059	50.0634	1.8424	-2.191	31.7018
live leaves	M12	Xylopia sericea	-34.282	43.6483	2.3224	2.877	21.9269
live leaves	M12	Xylopia sericea	-31.554	51.8846	1.3048	-2.704	46.3918
live leaves	M12	Xylopia sericea	-32.66	51.1975	1.5296	-0.978	39.0497
live leaves	M12	Xylopia sericea	-31.694	52.0428	2.1944	-1.169	27.6689
live leaves	M12	Xylopia sericea	-32.052	48.7481	2.0704	-1.866	27.4694
live leaves	M12	Xylopia sericea	-31.313	48.3508	1.8344	-0.214	30.7508
live leaves	M12	Xylopia sericea	-30.88	49.9029	1.9344	4.951	30.0972
live leaves	M12	Xylopia sericea	-31.349	50.3614	1.8928	-1.957	31.0413
live leaves	M12	Siparuna guianenses	-32.814	47.3218	1.8008	-1.166	30.6579
live leaves	M12	Siparuna guianenses	-32.087	44.7904	2.3616	-0.061	22.1272
live leaves	M12	Siparuna guianenses	-32.393	46.0527	1.3104	-1.536	41.0013
live leaves	M12	Siparuna guianenses	-31.603	47.2826	2.404	0.649	22.9463
live leaves	M12	Siparuna guianenses	-31.751	46.6844	2.6448	-1.211	20.5933
live leaves	M12	Siparuna guianenses	-32.629	45.9487	1.9232	-0.487	27.8738
live leaves	M12	Siparuna guianenses	-32.305	46.2213	2.5032	-0.135	21.5423
live leaves	M12	Siparuna guianenses	-32.845	51.2968	1.248	0.263	47.9537
live leaves	M12	Siparuna guianenses	-31.991	45.5711	2.672	-0.87	19.8976
live leaves	M12	Siparuna guianenses	-32.348	46.5827	2.952	-0.815	18.4101
live leaves	M12	Siparuna guianenses	-32.102	44.3377	2.72	0.906	19.0174
live leaves	M12	Siparuna guianenses	-32.051	46.4603	3.0416	0.172	17.8208
live leaves	M12	Siparuna guianenses	-32.426	45.3043	2.2912	1.395	23.0687
live leaves	M12	Siparuna guianenses	-32.569	42.423	2.07	-0.279	23.9099
live leaves	M12	Siparuna guianenses	-31.918	44.8905	2.533	-1.121	20.676
live leaves	M12	Byrsonima sericea	-32.189	46.057	1.397	-0.362	38.4633
live leaves	M12	Byrsonima sericea	-31.463	45.6967	1.473	-0.417	36.1934
live leaves	M12	Byrsonima sericea	-32.517	44.2575	1.56	-0.804	33.0985
live leaves	M12	Byrsonima sericea	-32.371	45.1266	1.313	-0.566	40.0973
live leaves	M12	Byrsonima sericea	-32.718	45.4204	1.389	-0.331	38.1501
live leaves	M12	Byrsonima sericea	-31.807	45.8856	1.505	-0.559	35.5702
live leaves	M12	Byrsonima sericea	-31.701	45.6058	1.456	-0.741	36.5431
live leaves	M12	Byrsonima sericea	-32.381	45.2123	1.767	-0.117	29.8516
live leaves	M12	Byrsonima sericea	-32.715	45.5883	1.398	-0.364	38.0446
live leaves	M12	Byrsonima sericea	-33.24	45.27	1.425	-0.346	37.0632
live leaves	M12	Byrsonima sericea	-32.479	45.688	1.403	0.942	37.9919
live leaves	M12	Byrsonima sericea	-31.045	44.7786	1.395	0.571	37.4493
live leaves	M12	Byrsonima sericea	-33.01	44.5373	1.231	-0.336	42.2097
live leaves	M12	Byrsonima sericea	-33.023	46.4103	1.466	-0.658	36.934
live leaves	M12	Byrsonima sericea	-33.132	45.1966	1.298	-0.326	40.6235
live leaves	M3	Xylopia sericea	-31.152	0.837	43.7882	2.61046	16.7741
live leaves	M3	Xylopia sericea	-32.095	0.918	43.6079	1.96301	22.2147
live leaves	M3	Xylopia sericea	-31.451	1.536	44.118	2.13516	24.5986
live leaves	M3	Xylopia sericea	-31.181	0.652	45.4015	2.11147	23.9007
live leaves	M3	Xylopia sericea	-30.262	0.98	44.129	2.71508	23.9263
live leaves	M3	Xylopia sericea	-30.941	0.224	43.9748	1.85123	21.2237
live leaves	M3	Xylopia sericea	-32.369	0.557	41.7461	2.03648	20.4992
live leaves	M3	Siparuna guianenses	-31.846	0.298	44.7101	1.87197	23.884
live leaves	M3	Siparuna guianenses	-32.101	-0.036	44.65	1.96359	22.739
	M3	Siparuna guianenses	-32.215	1.399	45.9615	1.96733	13.6667
live leaves	M3	Siparuna guianenses	-31.481	-1.823	25.506	2.175	13.6814
live leaves	M3	Siparuna guianenses	-31.429	-0.825	25.86	2.486	12.136
live leaves	M3	Siparuna guianenses	-31.24	-1.232	25.641	2.612	11.4527
live leaves	M3	Siparuna guianenses	-32.395	0.497	47.7132	1.73015	27.5775
live leaves	M3	Byrsonima sericea	-32.09	1.305	45.3254	1.61392	28.084
live leaves	M3	Byrsonima sericea	-32.135	0.449	47.3332	1.5518	30.5022
live leaves	M3	Byrsonima sericea	-33.366	0.343	48.0592	1.79499	26.7741
live leaves	M3	Byrsonima sericea	-31.402	0.903	47.2554	1.82216	25.9338
live leaves	M3	Byrsonima sericea	-30.078	2.356	44.5775	2.251	23.104
